# Supplementary material for: ABCA4 c.6480-35A>G, a novel branchpoint variant associated with Stargardt disease
Source: PubMed Central journal article supplement (PMC10539688; doi:10.3389/fgene.2023.1234032), 2023-09-07
Supplement: Table1.pdf [file Table1.pdf]

SUPPLEMENTARY TABLE S1

Oligonucleotides employed in this study.

| Name                  | Sequence (5' to 3')           | Genomic position (hg38) | Product size (bp) |
|-----------------------|-------------------------------|-------------------------|-------------------|
| Mut_c.6480-35A>G_Fwd  | CAGGCCTCTGCTAGTGGTTGGGCCTAAGG | -                       | 6,457             |
| Mut_c.6480-35A>G_Rev  | CCTTAGGCCCAACCACTAGCAGAGGCCTG | -                       |                   |
| BA29_Fwd              | ATCAGAGAAGGGGAGGGCTGT         | Chr1:94001020           | 425               |
| BA29_Rev              | GTCCAGTGTGGTCTGTGTGAC         | Chr1:94463420           |                   |
| <i>RHO</i> _exon5_Fwd | ATCTGCTGCGGCAAGAAC            | Chr3:129533632          | 140               |
| <i>RHO</i> _exon5_Rev | AGGTGTAGGGGATGGGAGAC          | Chr3:129533752          |                   |
